# Supplementary material
Source: Research Square preprint supplement (doi:10.21203/rs.3.rs-9342179/v1)
Supplement: Supplementary file 1 [file b4e399b5ff95a8a962936cee.docx]

The differential metabolites enriched in the KEGG metabolic pathway (*p* < 0.05)

| **Differential metabolic pathways** | **Metabolite** | **Regulate** |
| --- | --- | --- |
| Plant hormone signal transduction | (S)-Abscisic acid | down |
| Dihydrozeatin | down |
| Salicylic Acid | up |
| One carbon pool by folate | (6R)-Folinic acid | down |
| 10-Formyltetrahydrofolate | down |
| Folinic acid | down |
| Citrate cycle (TCA cycle) | Aconitic acid | down |
| Succinic acid | up |
| Cis-Aconitic Acid | down |
| Fumaric acid | up |
| Alanine, aspartate and glutamate metabolism | Gamma-Aminobutyric acid | down |
| Succinic acid | up |
| Fumaric acid | up |
| 1-Pyrroline-5-carboxylic acid | down |
| Riboflavin metabolism | 6,7-Dimethyl-8-(1-D-ribityl) lumazine | up |
| 5-Amino-6-ribitylamino uracil | down |
| 5-Amino-6-(5'-phosphoribitylamino) uracil | up |
| FMNH2 | down |
| Phenylalanine, tyrosine and tryptophan biosynthesis | 4-Hydroxyphenylpyruvic Acid | up |
| 5-Dehydroquinic acid | up |
| (-)-Shikimic acid | up |
| Shikimic Acid | up |
| 3-Dehydroshikimate | up |
| Arachidonic acid metabolism | 14,15-DiHETrE | down |
| 20-Hydroxy-leukotriene E4 | down |
| PC (16:1(9Z)/18:3(9Z,12Z,15Z)) | up |
| Thromboxane | down |
| 15-Hydroxy-5,8,11,13-eicosatetraenoic acid | up |
| 20-hydroxyleukotriene B4 | down |
| Prostaglandin G2 | down |
| 11-Dehydro-thromboxane B2 | down |
| Tyrosine metabolism | Beta-Tyrosine | down |
| 4-Hydroxyphenylpyruvic Acid | up |
| Homogentisic acid | up |
| Succinic acid | up |
| Tyrosol | down |
| Gentisate aldehyde | down |
| Leucodopachrome | down |
| 3,4-Dihydroxybenzeneacetic acid | down |
| Fumaric acid | up |
| Arginine and proline metabolism | Octopine | down |
| N1-trans-Feruloylagmatine | down |
| 4-Hydroxycinnamoylagmatine | down |
| Homocarnosine | down |
| N(omega)-Hydroxyarginine | down |
| Gamma-Aminobutyric acid | down |
| N-Acetylputrescine | down |
| D-4-Hydroxy-2-oxoglutarate | up |
| 1-Pyrroline-5-carboxylic acid | down |
| Flavonoid biosynthesis | Tricetin | down |
| 5-p-Coumaroylquinic acid | up |
| Naringin dihydrochalcone | up |
| Vitexin 6''-O-malonyl 2''-O-xyloside | up |
| Kaempferol | down |
| Taxifolin | up |
| Vitexin | up |
| Caffeoylshikimate | up |
| Gallocatechin | down |
| Phenylpropanoid biosynthesis | Coniferyl acetate | up |
| Scopolin | up |
| 5-p-Coumaroylquinic acid | up |
| Methylisoeugenol | down |
| Ferulic Acid | down |
| Coniferyl alcohol | down |
| Cis-Melilotoside | up |
| Umbelliferone | down |
| 4-Coumaric acid | down |
| P-Coumaric Acid | down |
| 4-Hydroxy-3-methoxycinnamic acid | down |
| 5-Hydroxyferulic acid | down |
| Caffeoylshikimate | up |
| Coniferaldehyde | down |
| Flavone and flavonol biosynthesis | Scolymoside | down |
| Meloside | up |
| Quercetin 3-methyl ether | down |
| Isovitexin | up |
| Vitexin 6''-O-malonyl 2''-O-xyloside | up |
| 3-O-Methylquercetin | down |
| Kaempferol | down |
| Quercetin 3-O-Malonylglucoside | down |
| Kaempferol-3-O-rutinoside | down |
| Afzelin | down |
| Isoquercitrin | down |
| Rutin | down |
| Vitexin | up |
| Rhoifolin | up |
| Lampranthin II | up |
| Glycerophospholipid metabolism | PA(20:5(5Z,8Z,11Z,14Z,17Z)/18:4(6Z,9Z,12Z,15Z)) | down |
| Glycerylphosphorylcholine | down |
| Diethanolamine | down |
| LysoPC(16:0/0:0) | up |
| PC(16:1(9Z)/18:3(9Z,12Z,15Z)) | up |
| LysoPC(20:5(5Z,8Z,11Z,14Z,17Z)/0:0) | down |
| Citicoline | up |
| PG(22:6(4Z,7Z,10Z,13Z,16Z,19Z)/16:1(9Z)) | down |
| PA(8:0/i-14:0) | down |
| PA(16:0/18:1(11Z)) | down |
| PA(20:3(5Z,8Z,11Z)/16:0) | down |
| PA(20:5(5Z,8Z,11Z,14Z,17Z)/20:4(8Z,11Z,14Z,17Z)) | down |
| PA(18:3(6Z,9Z,12Z)/18:3(9Z,12Z,15Z)) | down |
| PG(i-13:0/i-16:0) | down |
| PA(18:2(9Z,12Z)/16:0) | down |
| PE(18:4(6Z,9Z,12Z,15Z)/15:0) | down |
| L-Serine | down |
| Biosynthesis of cofactors | Biotin | up |
| 7,8-Dihydroneopterin | down |
| L-Gluconic acid | down |
| Aldosterone 18-glucuronide | up |
| Nicotinamide | down |
| Tyramine glucuronide | up |
| L-Cystathionine | up |
| D-Threo biopterin | down |
| Phenethylamine glucuronide | down |
| Deoxycholic acid 3-glucuronide | up |
| Oxidized Glutathione | down |
| Withanolide B | up |
| 4-Hydroxyphenylpyruvic Acid | up |
| 6,7-Dimethyl-8-(1-D-ribityl)lumazine | up |
| Isochorismate | up |
| 5-Amino-6-ribitylamino uracil | down |
| Homogentisic acid | up |
| Uridine-5'-Monophosphate | up |
| Adenosine 5'-Monophosphate | up |
| 3-Methoxy-4-hydroxyphenylglycol glucuronide | up |
| (1R,6R)-6-hydroxy-2-succinylcyclohexa-2,4-diene-1-carboxylate | down |
| 5-Amino-6-(5'-phosphoribitylamino)uracil | up |
| Dehydroisoandrosterone 3-glucuronide | up |
| (-)-Shikimic acid | up |
| FMNH2 | down |
| 7,8-Dihydropteroic acid | up |
| 10-Formyltetrahydrofolate | down |
| Shikimic Acid | up |
| 3-Dehydroshikimate | up |
| 2',3' cyclic CMP | down |
| L-Serine | down |
